# Supplementary material
Source: publisher figshare collection journal article supplement (https://frontiersin.figshare.com/ndownloader/files/21997605)
Supplement: Supplementary file [file 21997605]

## APPENDIX

**Figure A.1. Distribution of components of the agentic individuality factor by analytic groups: creative.**

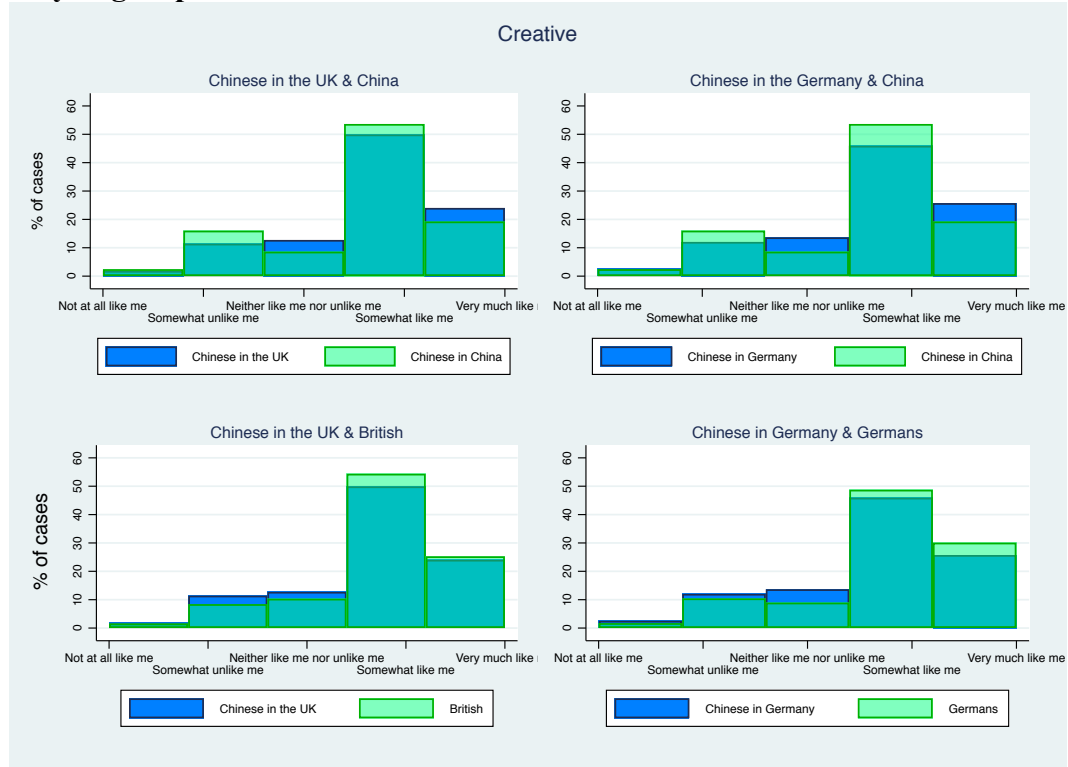

Source: *Bright Futures Survey*.

**Figure A.2. Distribution of components of the agentic individuality factor by analytic groups: independent minded.**

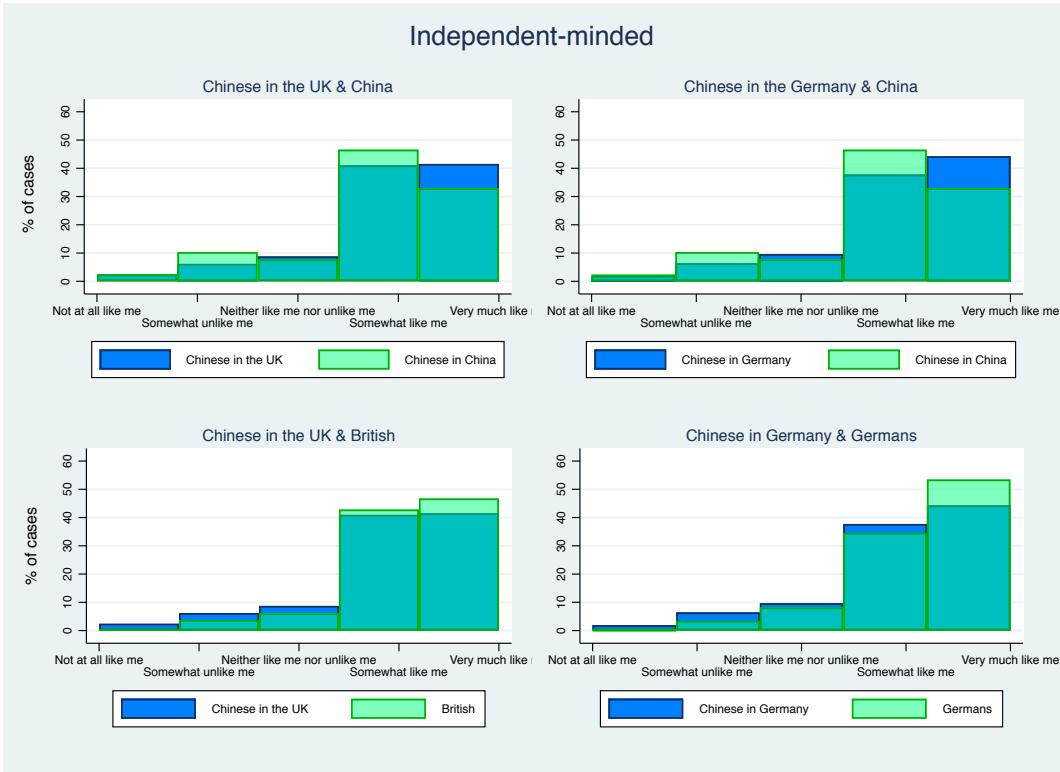

Source: *Bright Futures Survey*.

**Figure A.3. Distribution of components of the agentic individuality factor by analytic groups: risk-taker.**

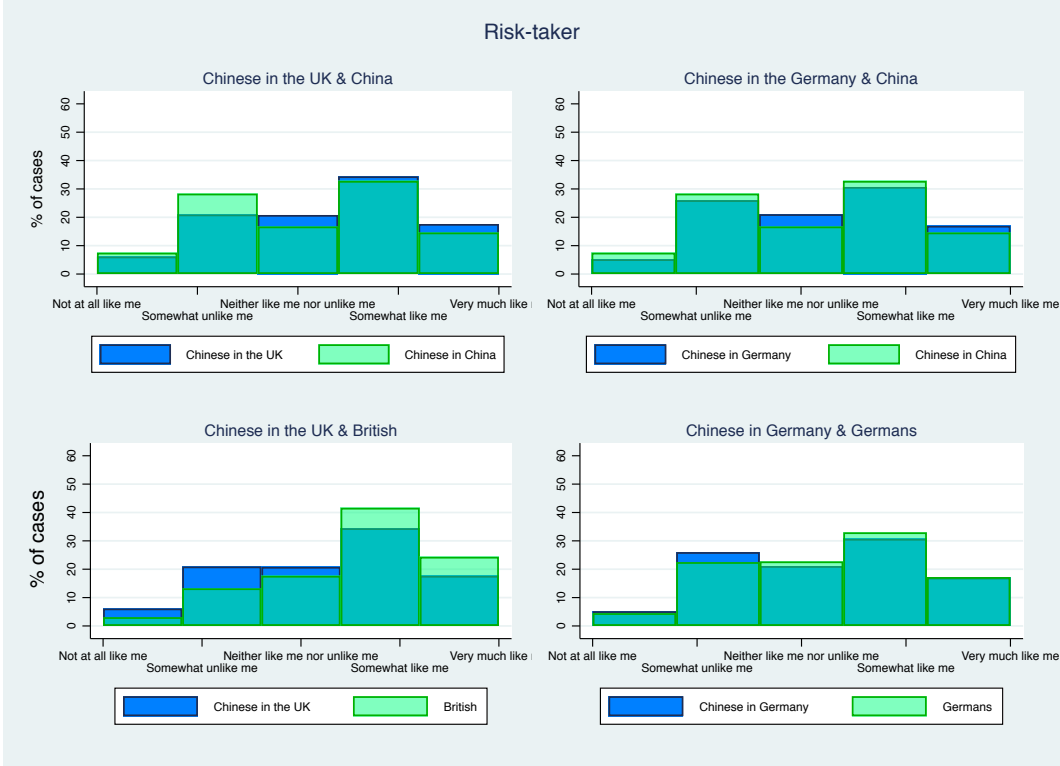

Source: *Bright Futures Survey*.

**Figure A.4. Distribution of components of the agentic individuality factor by analytic groups: achievement oriented.**

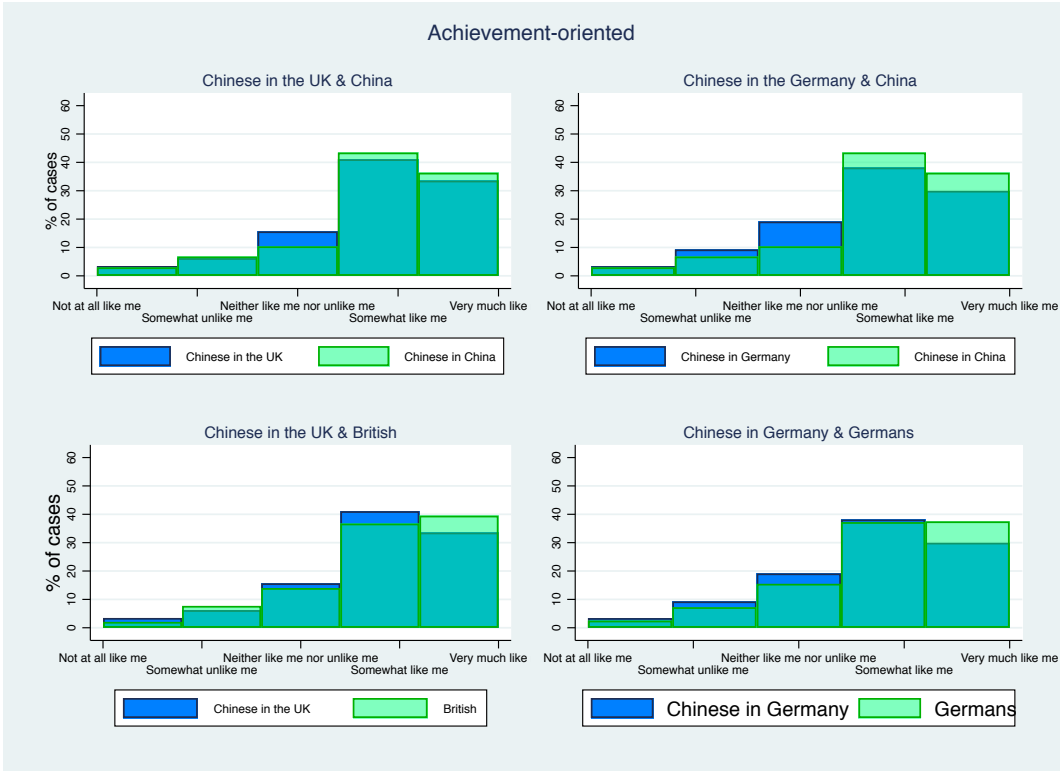

Source: *Bright Futures Survey*.

**Table A.1. Principal component analysis**

| <b>Selected component</b> | <b>Eigenvalue</b> | <b>Proportion</b> |
|---------------------------|-------------------|-------------------|
| Agentic individual        | 1.90              | 0.47              |

| <b>Eigenvectors</b>  | <b>Agentic individuality index</b> |
|----------------------|------------------------------------|
| Creative             | 0.5528                             |
| Independent-minded   | 0.5513                             |
| Risk-taking          | 0.4884                             |
| Achievement oriented | 0.3898                             |

**Figure A.5. Kernel distribution of the agentic individual index.**

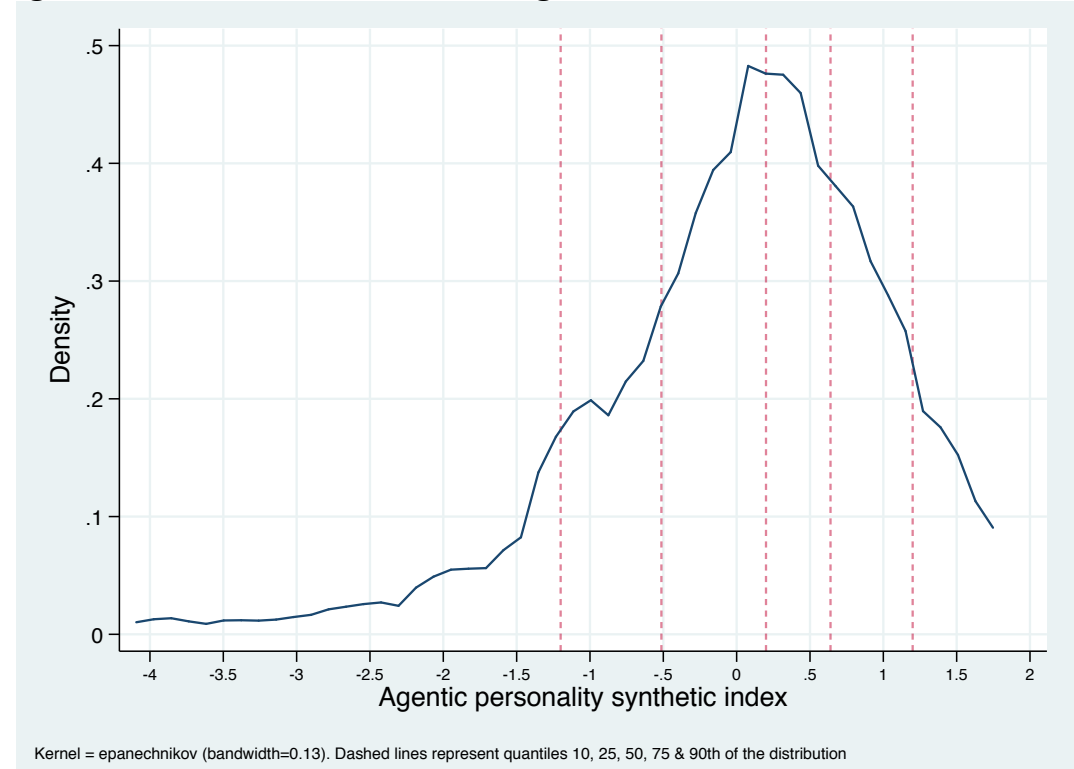

Source: Our elaboration from *Bright Futures Survey*.

**Table A.2. Description of variables used in the empirical analyses**

|                                                | <b>Variable</b>                                         | <b>Mean</b> | <b>Std. Dev.</b> | <b>Min</b> | <b>Max</b> |
|------------------------------------------------|---------------------------------------------------------|-------------|------------------|------------|------------|
| Agentic individual characteristics             |                                                         | -0.13       | 1.4              | -5.5       | 2.2        |
| Father's occupation                            | Professional and technical or high-level administration | 0.46        | 0.50             | 0          | 1          |
| Father's education                             | University                                              | 0.30        | 0.50             | 0          | 1          |
| Student female                                 |                                                         | 0.59        | 0.49             | 0          | 1          |
| Student 5th percentile of class in high school |                                                         | 0.62        | 0.48             | 0          | 1          |
| Student rural setting in China                 |                                                         |             |                  |            |            |

Source: Our elaboration from *Bright Futures Survey*.

**Table A.3. Linear Probability Models on individual characteristics by sample**

|                                          | (1)<br>Creative   | (2)<br>Independent-<br>minded | (3)<br>Risk-taker | (4)<br>Achievement<br>oriented |
|------------------------------------------|-------------------|-------------------------------|-------------------|--------------------------------|
| Chinese in UK<br>(ref. Chinese in China) | 0.011<br>(0.014)  | 0.030*<br>(0.012)             | 0.047*<br>(0.016) | -0.052*<br>(0.013)             |
| Chinese in Germany                       | -0.012<br>(0.018) | 0.025<br>(0.015)              | 0.0024<br>(0.020) | -0.12*<br>(0.017)              |
| British                                  | 0.068*<br>(0.013) | 0.10*<br>(0.011)              | 0.19*<br>(0.015)  | -0.036*<br>(0.013)             |
| Germans                                  | 0.059*<br>(0.023) | 0.085*<br>(0.020)             | 0.028<br>(0.026)  | -0.051*<br>(0.022)             |
| Constant                                 | 0.73*<br>(0.008)  | 0.80*<br>(0.007)              | 0.47*<br>(0.009)  | 0.80*<br>(0.007)               |
| F                                        | 8.91              | 22.4                          | 42.2              | 13.1                           |
| N                                        | 7534              | 7534                          | 7534              | 7534                           |
| R <sup>2</sup>                           | 0.0047            | 0.012                         | 0.022             | 0.0069                         |

Source: Our elaboration from *Bright Futures Survey*.

Standard errors in parentheses; \* $p < 0.05$ .



**Figure A.6. Differences in selected individual characteristics across student groups by gender.**

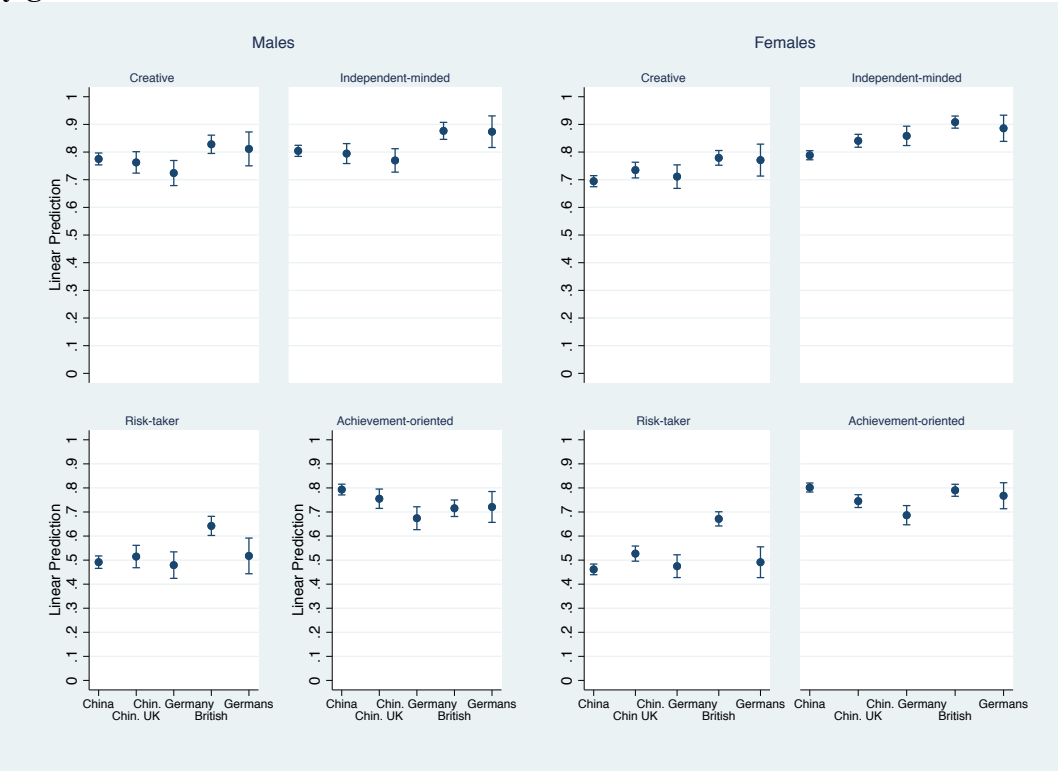

Source: Our elaboration from *Bright Futures Survey*. Estimated from models not shown in the paper but available upon request. Estimates and 95% confidence intervals.
